# Supplementary material
Source: PubMed Central journal article supplement (PMC4100988)
Supplement: cbt-15-878-s01.pdf [file cbt-15-878-s01.pdf]

## **Supplemental Material to:**

**Yingjun Quan, Runsen Jin, Ao Huang, Hongchao Zhao,  
Bo Feng, Lu Zang, and Minhua Zheng**

**Downregulation of GRHL2 inhibits the proliferation  
of colorectal cancer cells targeting ZEB1**

**Cancer Biology & Therapy 2014; 15(7)  
<http://dx.doi.org/10.4161/cbt.28877>**

**<http://www.landesbioscience.com/journals/cbt/article/28877/>**

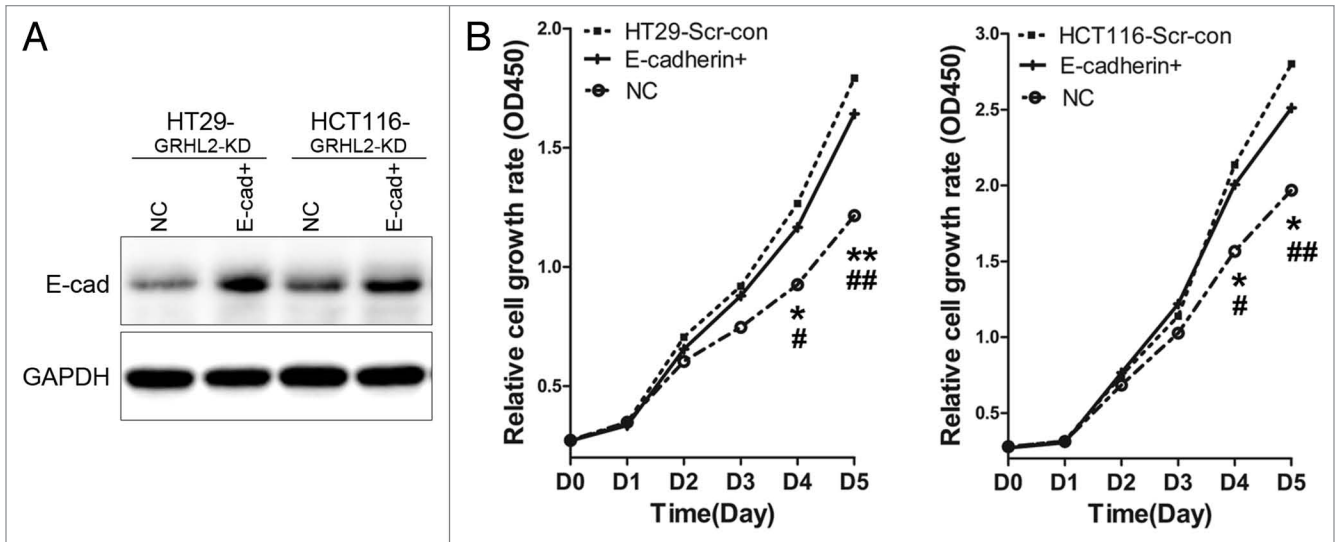

**Figure S1.** Re-expression of E-cadherin restored proliferative ability in GRHL2-knockdown CRC cells. **(A)** Transfection of plasmid E-cadherin-pcDNA3.0 increased E-cadherin protein expression in HT29/GRHL2-KD and HCT116/GRHL2-KD cells. **(B)** Forced ectopic expression of E-cadherin enhanced the proliferative ability of GRHL2-KD cells to a similar level as observed in Scr-con cells. \*Relative to E-cadherin+ vs. NC. \* $P < 0.05$ , \*\* $P < 0.01$ . #Relative to Scr-con vs. NC. # $P < 0.05$ , ## $P < 0.01$ . Data were expressed as the means  $\pm$  SD from 3 separate experiments.
